# Supplementary material for: Full-Length SSU rRNA Gene Sequencing Allows Species-Level Detection of Bacteria, Archaea, and Yeasts Present in Milk
Source: MDPI journal article supplement (doi:10.3390/microorganisms9061251), 2021-06-09
Supplement: s1 [file s1]

## Supplementary Materials

**Table S1.** PCR condition for 1<sup>st</sup> step short amplicon 16S PCR.

| PCR step             |        | Temperature |       | Time  | Step      |
|----------------------|--------|-------------|-------|-------|-----------|
| Initial Denaturation |        | 98 °C       |       | 2 min | 1 cycle   |
| Denaturation         |        | 98 °C       |       | 10 s  |           |
| Annealing            | V1V2:  | 57 °C       | milk: | 30 s  | 20 cycles |
|                      | V3–V4: | 55 °C       | mock: | 30 s  | 15 cycles |
| Extension            |        | 72 °C       | milk: | 90 s  |           |
|                      |        | 72 °C       | mock: | 40 s  |           |
| Final Extension      |        | 72 °C       |       | 2 min | 1 cycle   |
| Storage              |        | 4 °C        |       | hold  |           |

**Table S2.** PCR condition for 2<sup>nd</sup> step short amplicon 16S PCR.

| PCR step             | Temperature | Time  | Step      |
|----------------------|-------------|-------|-----------|
| Initial Denaturation | 98 °C       | 40 s  | 1 cycle   |
| Denaturation         | 98 °C       | 20 s  |           |
| Annealing            | 55 °C       | 40 s  | 10 cycles |
| Extension            | 72 °C       | 40 s  |           |
| Final Extension      | 72 °C       | 2 min | 1 cycle   |
| Storage              | 4 °C        | hold  |           |

**Table S3.** 16S rRNA gene short amplicon primer sequences.

| Targeted region | Forward primer (5'–3')     | Reverse primer (5'–3')      | Reference               |
|-----------------|----------------------------|-----------------------------|-------------------------|
| V1–V2           | AGA GTT TGA TYM TGG CTC AG | GCT GCC TCC CGT AGG AGT     | Salter, et al. [40]     |
| V3–V4           | CCT ACG GGN GGC WGC AG     | GAC TAC HVG GGT ATC TAA TCC | Klindworth, et al. [52] |

**Table S4.** PCR condition for LoopSeq Enrichment PCR.

| PCR step             | Temperature | Time  | Step      | Ramp speed |
|----------------------|-------------|-------|-----------|------------|
| Initial Denaturation | 95 °C       | 3 min | 1 cycle   | 2 °C/s     |
| Denaturation         | 98 °C       | 15 s  |           |            |
| Annealing            | 52 °C       | 20 s  | 30 cycles | 2 °C/s     |
| Extension            | 72 °C       | 2 min |           |            |
| Storage              | 4 °C        | hold  |           | 2 °C/s     |

**Table S5.** List of complete taxonomy of microorganisms detected within the milk samples processed using the full-length SSU rRNA gene sequencing approach (Excel table).
